# Supplementary material
Source: ML conference proceedings conference paper supplement (https://proceedings.neurips.cc/paper_files/paper/2020/hash/c1714160652ca6408774473810765950-Abstract.html)

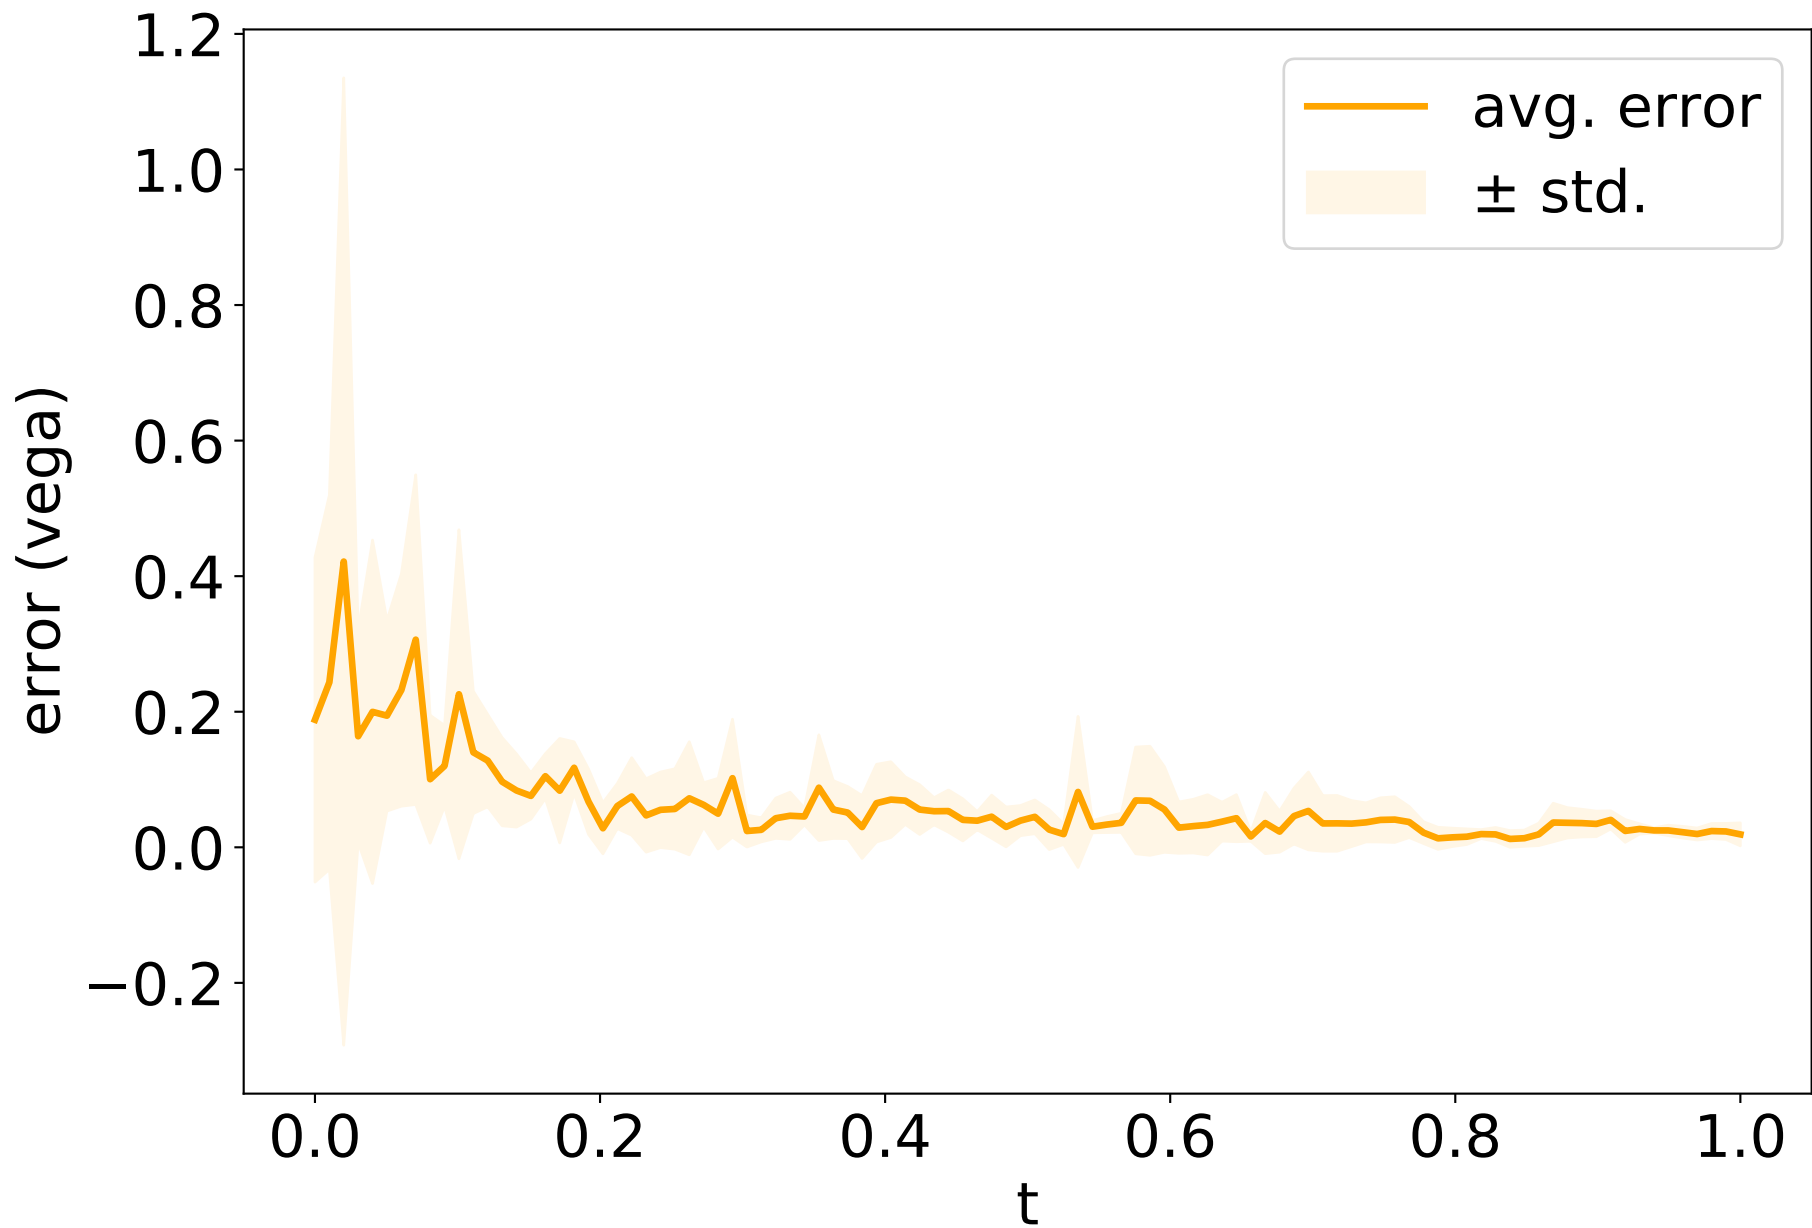

Supplement: Supplementary file [file c1714160652ca6408774473810765950-Supplemental.zip]
